# Supplementary material for: Changes in Health Insurance Coverage Over Time by Immigration Status Among US Older Adults, 1992-2016
Source: PubMed Central journal article supplement (PMC7066476; doi:10.1001/jamanetworkopen.2020.0731), 2020-03-11

## Supplementary Online Content

Cobian J, González MG, Cao YJ, et al. Changes in health insurance coverage over time by immigration status among US older adults, 1992-2016. *JAMA Netw Open*. 2020;3(3):e200731. doi:10.1001/jamanetworkopen.2020.0731

**eFigure 1.** Medicare Insurance Coverage Over Time by Immigration Status

**eFigure 2.** Medicaid Insurance Coverage Over Time by Immigration Status

**eFigure 3.** Employer Insurance Coverage Over Time by Immigration Status

**eFigure 4.** Other Insurance Coverage Over Time by Immigration Status

This supplementary material has been provided by the authors to give readers additional information about their work.

eFigure 1: Medicare Insurance Coverage Over Time by Immigration Status

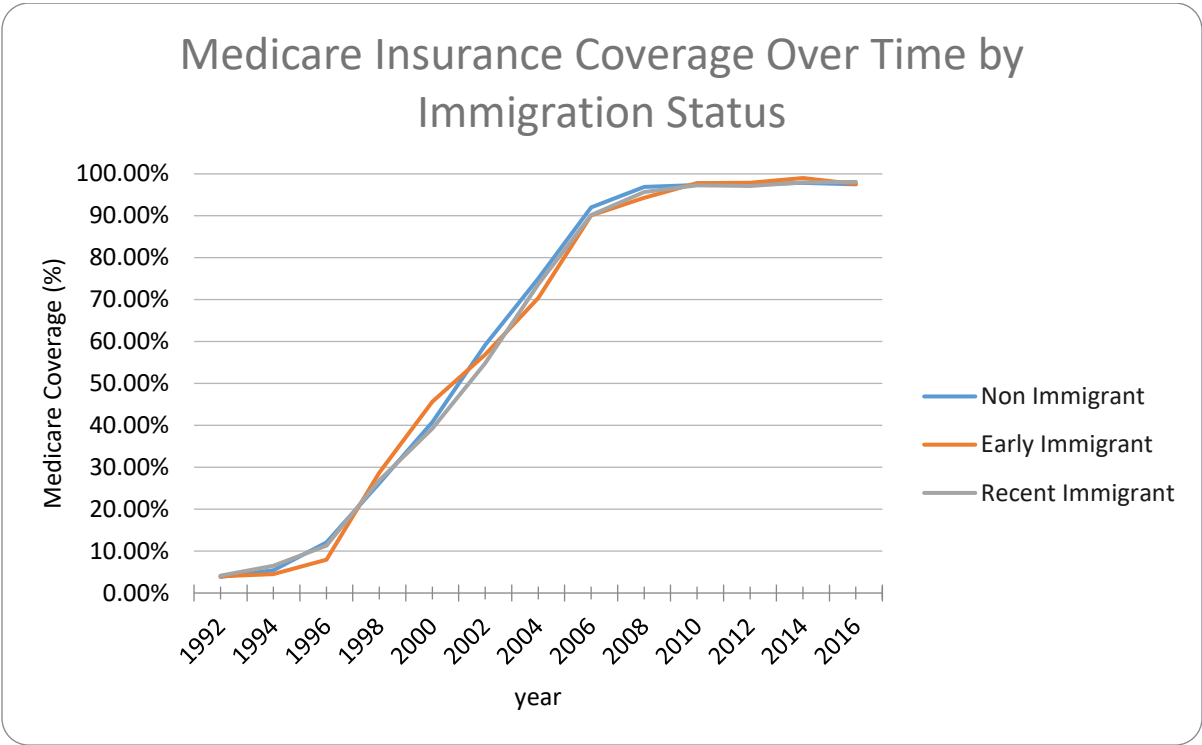

eFigure 2: Medicaid Insurance Coverage Over Time by Immigration Status

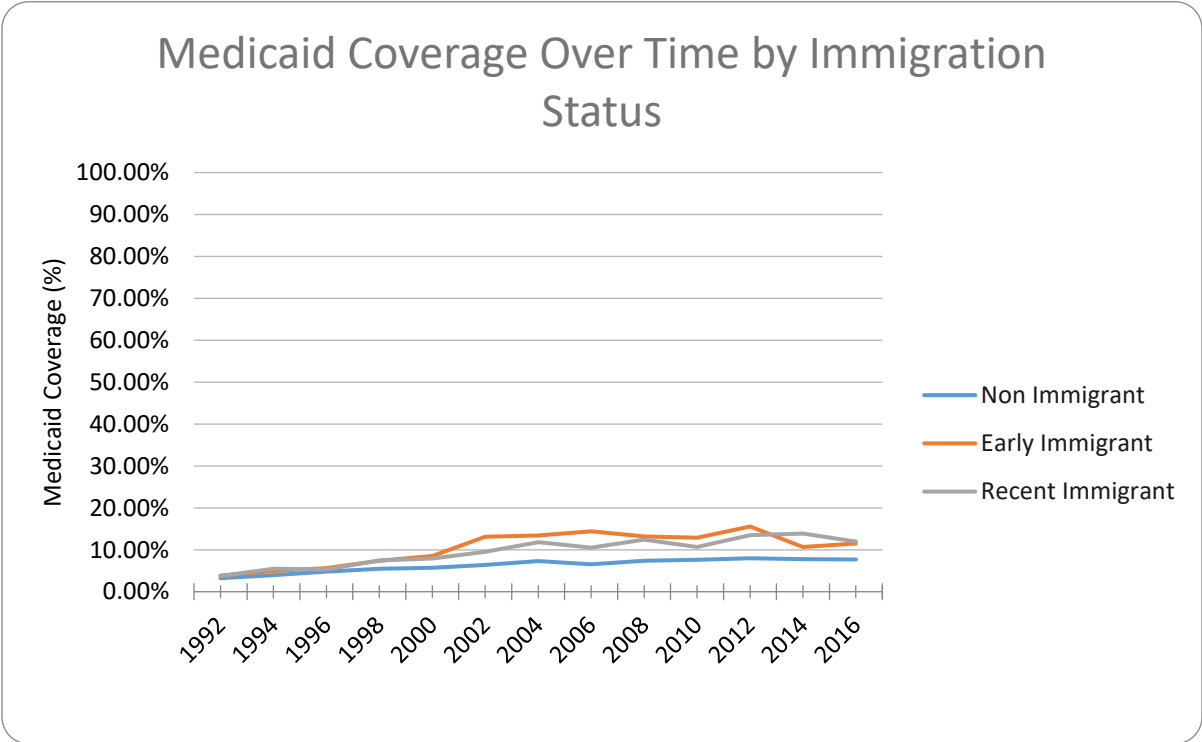

eFigure 3: Employer Insurance Coverage Over Time by Immigration Status

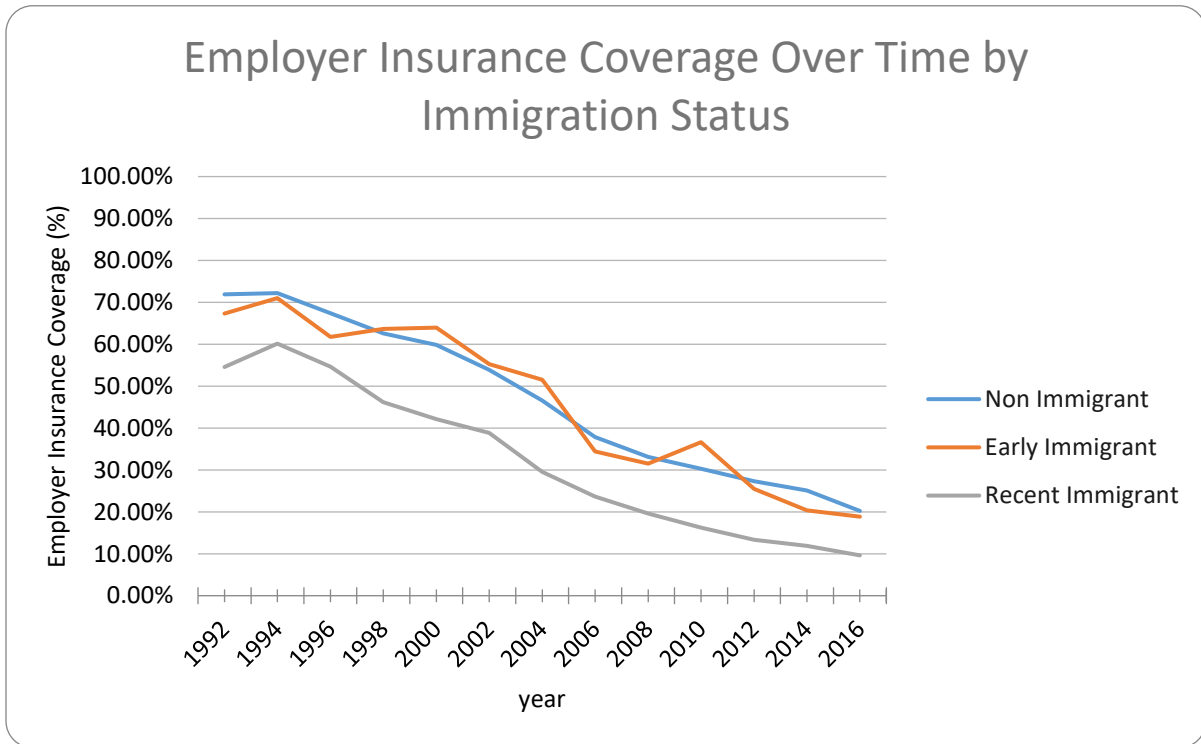

eFigure 4: Other Insurance Coverage Over Time by Immigration Status

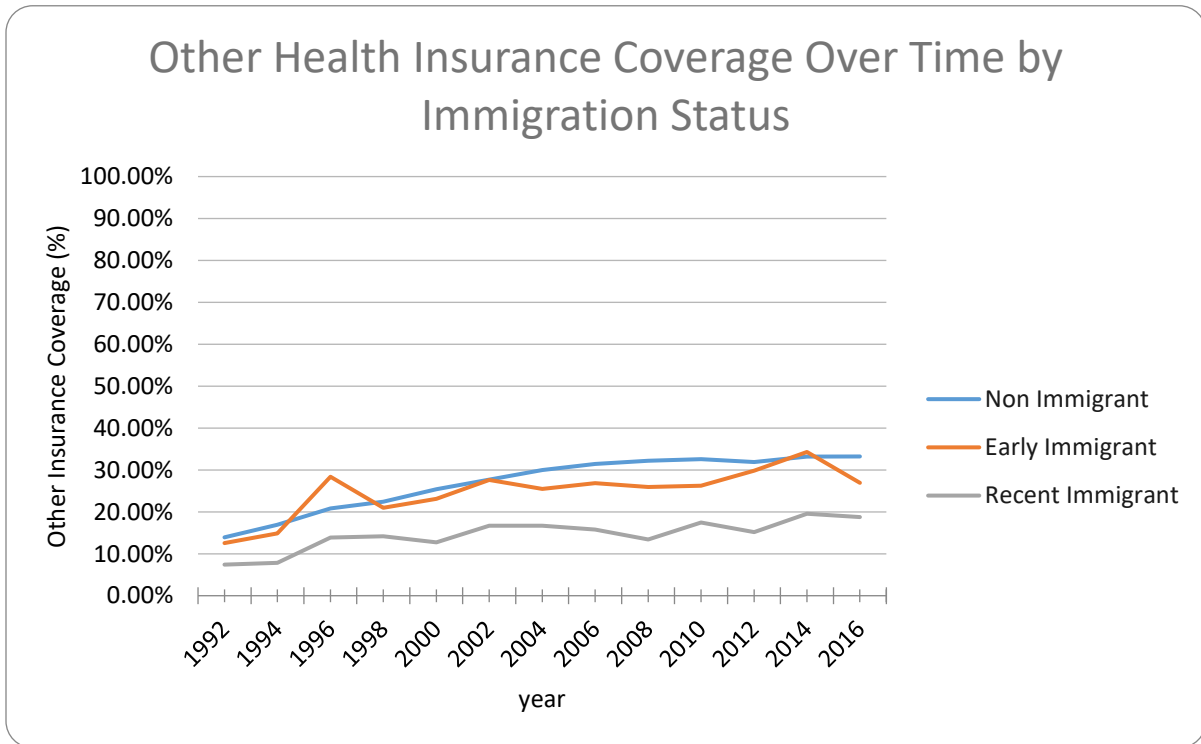

Supplement: jamanetwopen-3-e200731-s001.pdf [file jamanetwopen-3-e200731-s001.pdf]
